# Supplementary material
Source: ML conference proceedings conference paper supplement (https://aclanthology.org/D19-1063)
Supplement: Attachment [file D19-1063.Attachment.zip]

Archive with 1 entries (1 files):
- 1542_appendix.pdf
